# Supplementary material for: Proof of Concept and Moderators of Transference Processes in an Online Setting
Source: Oxford University Press journal article supplement (doi:10.1525/collabra.24720), 2021-01-01
Supplement: collabra_2021_7_1_24720_62667.docx [file collabra_2021_7_1_24720_62667.docx]

| **Table S1.** |  |  |  |  |  |  |  |  |
| --- | --- | --- | --- | --- | --- | --- | --- | --- |
| *Regression results predicting certainty scores controlling for gender, relationship status, and likeableness scores including models moderated by age and attachment excluding suspicious participants* | | | | | | | | |
|  | Base Model | |  |  | Age Moderation | | Attachment Moderation | |
|  | *b* | *se* | *df* | *t* | *b* | *se* | *b* | *se* |
| Intercept | 2.377*** | 0.036 | 483.763 | 65.792 | 2.370*** | 0.035 | 2.377*** | 0.030 |
| Target | 0.105*** | 0.010 | 682.031 | 10.468 | 0.105*** | 0.010 | 0.106*** | 0.010 |
| Condition | -0.012 | 0.030 | 479.536 | -0.391 | 0.017 | 0.029 | -0.011 | 0.025 |
| Target × Condition | 0.010 | 0.009 | 482.068 | 1.038 | 0.007 | 0.009 | 0.011 | 0.009 |
| Age |  |  |  |  | -0.020*** | 0.003 |  |  |
| Age × Target |  |  |  |  | 0.002* | 0.001 |  |  |
| Age × Condition |  |  |  |  | 0.003 | 0.003 |  |  |
| Age × Target × Condition |  |  |  |  | 0.001 | 0.001 |  |  |
| Anxiety |  |  |  |  |  |  | 0.192*** | 0.013 |
| Avoidance |  |  |  |  |  |  | -0.084*** | 0.023 |
| Anxiety × Target |  |  |  |  |  |  | -0.027*** | 0.005 |
| Avoidance × Target |  |  |  |  |  |  | -0.006 | 0.008 |
| Anxiety × Condition |  |  |  |  |  |  | 0.005 | 0.013 |
| Avoidance × Condition |  |  |  |  |  |  | 0.037 | 0.023 |
| Anxiety × Target × Condition |  |  |  |  |  |  | -0.008 | 0.005 |
| Avoidance × Target × Condition |  |  |  |  |  |  | 0.020* | 0.008 |
| Gender | 0.059 | 0.030 | 479.314 | 1.961 | 0.029 | 0.029 | 0.057* | 0.025 |
| Relationship Status | 0.213*** | 0.035 | 479.127 | 6.143 | 0.221*** | 0.033 | 0.186*** | 0.029 |
| Likeableness Scores | -0.044** | 0.014 | 1585.363 | -3.151 | -0.044** | 0.014 | -0.045** | 0.014 |
| Note. Target is coded significant other=1, control targets=-1. | | | |  |  |  |  |  |
| Condition is coded ex-partner=1, parent=-1. | | | | | | | | |
| Gender is coded men=1, women=-1. | |  |  |  |  |  |  |  |
| Relationship status is coded in a relationship=1, single=-1. | | | | | | | | |
| ****p* <.001,***p* <.01,**p*<.05. | | | | | | | | |
