# Supplementary material for: Proof of Concept and Moderators of Transference Processes in an Online Setting
Source: Oxford University Press journal article supplement (doi:10.1525/collabra.24720), 2021-01-01
Supplement: collabra_2021_7_1_24720_63093.docx [file collabra_2021_7_1_24720_63093.docx]

| **Table S2.** | | |  |  |  |  |  |  |
| --- | --- | --- | --- | --- | --- | --- | --- | --- |
| *Regression results predicting preference scores controlling for gender, relationship status, and likeableness scores including models moderated by age and attachment excluding suspicious participants* | | | | | | | | |
|  | Base Model | |  |  | Age Moderation | | Attachment Moderation | |
|  | *b* | *se* | *df* | *t* | *b* | *se* | *b* | *se* |
| Intercept | 2.903*** | 0.047 | 496.155 | 62.306 | 2.907*** | 0.045 | 2.904*** | 0.040 |
| Target | 0.200*** | 0.026 | 711.528 | 7.799 | 0.212*** | 0.026 | 0.208*** | 0.024 |
| Condition | -0.027 | 0.038 | 480.590 | -0.703 | 0.009 | 0.037 | -0.025 | 0.033 |
| Target × Condition | -0.006 | 0.023 | 483.314 | -0.269 | -0.016 | 0.023 | -0.002 | 0.021 |
| Age |  |  |  |  | -0.027*** | 0.004 |  |  |
| Age × Target |  |  |  |  | 0.006* | 0.002 |  |  |
| Age × Condition | |  |  |  | -0.002 | 0.004 |  |  |
| Age × Target × Condition | | |  |  | -0.007** | 0.002 |  |  |
| Anxiety |  |  |  |  |  |  | 0.223*** | 0.018 |
| Avoidance |  |  |  |  |  |  | -0.152*** | 0.031 |
| Anxiety × Target | |  |  |  |  |  | -0.090*** | 0.011 |
| Avoidance × Target | |  |  |  |  |  | -0.047* | 0.020 |
| Anxiety × Condition | |  |  |  |  |  | 0.026 | 0.017 |
| Avoidance × Condition | |  |  |  |  |  | 0.026 | 0.030 |
| Anxiety × Target × Condition | | |  |  |  |  | 0.002 | 0.011 |
| Avoidance × Target × Condition | | |  |  |  |  | 0.003 | 0.020 |
| Gender | 0.172*** | 0.038 | 479.254 | 4.466 | 0.130*** | 0.037 | 0.164*** | 0.033 |
| Relationship Status | 0.186*** | 0.044 | 479.026 | 4.194 | 0.190*** | 0.043 | 0.158*** | 0.038 |
| Likeableness Scores | 0.369*** | 0.038 | 1634.860 | 9.755 | 0.366*** | 0.038 | 0.362*** | 0.038 |
| Note. Target is coded significant other=1, control targets=-1. | | | | |  |  |  |  |
| Condition is coded ex-partner=1, parent=-1. | | | |  |  |  |  |  |
| Gender is coded men=1, women=-1. | | |  |  |  |  |  |  |
| Relationship status is coded in a relationship=1, single=-1. | | | | |  |  |  |  |
| ****p* <.001, ***p* <.01, **p* <.05. | | |  |  |  |  |  |  |
