# Supplementary material for: Proof of Concept and Moderators of Transference Processes in an Online Setting
Source: Oxford University Press journal article supplement (doi:10.1525/collabra.24720), 2021-01-01
Supplement: collabra_2021_7_1_24720_63094.docx [file collabra_2021_7_1_24720_63094.docx]

| **Table S3.** |  |  |  |  |  |  |  |  |  |
| --- | --- | --- | --- | --- | --- | --- | --- | --- | --- |
| *Correlations between study variables* | |  |  |  |  |  |  |  |  |
| Variable | 1 | 2 | 3 | 4 | 5 | 6 | 7 | 8 | 9 |
| 1. Anxiety |  |  |  |  |  |  |  |  |  |
| 2. Avoidance | 0.29** |  |  |  |  |  |  |  |  |
| 3. Transference - SOT | 0.44** | -0.01 |  |  |  |  |  |  |  |
| 4. Transference - CTs | 0.58** | 0.05 | 0.83** |  |  |  |  |  |  |
| 5. Preference - SOT | 0.18** | -0.14** | 0.39** | 0.38** |  |  |  |  |  |
| 6. Preference - CTs | 0.60** | 0.06 | 0.62** | 0.74** | 0.48** |  |  |  |  |
| 7. Age | -0.27** | -0.10* | -0.25** | -0.30** | -0.24** | -0.34** |  |  |  |
| 8. Gender | 0.04 | 0.08 | 0.08 | 0.09* | 0.19** | 0.18** | -0.21** |  |  |
| 9. Relationship Status | -0.05 | 0.10* | -0.23** | -0.26** | -0.12** | -0.20** | -0.003 | 0.07 |  |
| 10. Word Likeableness - SOT | -0.13** | -0.12** | 0.04 | -0.03 | 0.17** | -0.07 | -0.10* | 0.05 | -0.11** |
| Note. Word Likeability for control targets was the same for all participants and thus is not displayed | | | | | | | |  |  |
| aSOT= Significant Other Target. bCTs = Control Targets.  Gender is coded men=1, women=0  Relationship status is coded in a relationship=1, single=0 | | | |  |  |  |  |  |  |
| **p* <.05, ***p* <.01. |  |  |  |  |  |  |  |  |  |
